# Supplementary material for: ALS and CHARGE syndrome: a clinical and genetic study
Source: Springer Nature journal article supplement (doi:10.1007/s13760-018-1029-2), 2018-10-13
Supplement: MOESM1 [file 16196540]

**Table 1**

The 39 ALS-related genes examined in this study

| <b>Gene</b>                                                                                       | <b>Location</b> | <b>Name</b>                                                      | <b>Gene MIM number</b> | <b>NCBI Reference Sequence</b> | <b>Phenotype</b>                                                          | <b>Phenotype MIM number</b> |
|---------------------------------------------------------------------------------------------------|-----------------|------------------------------------------------------------------|------------------------|--------------------------------|---------------------------------------------------------------------------|-----------------------------|
| <i>SOD1</i> ,<br><i>ALS1</i>                                                                      | 21q22.11        | Superoxide dismutase 1                                           | 147450                 | NM_000454.4                    | Amyotrophic lateral sclerosis 1                                           | 105400                      |
| <i>TARDBP</i> ,<br><i>TDP43</i> ,<br><i>ALS10</i>                                                 | 1p36.22         | TAR DNA-binding protein                                          | 605078                 | NM_007375.3                    | Amyotrophic lateral sclerosis 10, with or without frontotemporal dementia | 612069                      |
|                                                                                                   |                 |                                                                  |                        |                                | Frontotemporal lobar degeneration, TARDBP-related                         | 612069                      |
| <i>FUS</i> ,<br><i>TLS</i> ,<br><i>ALS6</i> ,<br><i>ETM4</i>                                      | 16p11.2         | Fusion, derived from 12-16 translocation, malignant liposarcom   | 137070                 | NM_004960.3                    | Essential tremor, hereditary, 4                                           | 614782                      |
|                                                                                                   |                 |                                                                  |                        |                                | Amyotrophic lateral sclerosis 6, with or without frontotemporal dementia  | 608030                      |
| <i>ANG</i> ,<br><i>RNASE5</i> ,<br><i>ALS9</i>                                                    | 14q11.2         | Angiogenin                                                       | 105850                 | NM_001145.4                    | Amyotrophic lateral sclerosis 9                                           | 611895                      |
| <i>CHCHD10</i> ,<br><i>FTDALS2</i> ,<br><i>SMAJ</i> ,<br><i>IMMD</i>                              | 22q11.23        | Coiled-coil-helix-coiled-coil-helix domain-containing protein 10 | 615903                 | NM_001301339.1                 | ?Myopathy, isolated mitochondrial, autosomal dominant                     | 616209                      |
|                                                                                                   |                 |                                                                  |                        |                                | Frontotemporal dementia and/or amyotrophic lateral sclerosis 2            | 615911                      |
|                                                                                                   |                 |                                                                  |                        |                                | Spinal muscular atrophy, Jokela type                                      | 615048                      |
| <i>OPTN</i> ,<br><i>GLC1E</i> ,<br><i>FIP2</i> ,<br><i>HYPL</i> ,<br><i>NRP</i> ,<br><i>ALS12</i> | 10p13           | Optineurin                                                       | 602432                 | NM_001008211.1                 | {Glaucoma, normal tension, susceptibility to}                             | 606657                      |
|                                                                                                   |                 |                                                                  |                        |                                | Glaucoma 1, open angle, E                                                 | 137760                      |
|                                                                                                   |                 |                                                                  |                        |                                | Amyotrophic lateral sclerosis 12                                          | 613435                      |

|                                                                                       |          |                       |        |             |                                                                                    |        |
|---------------------------------------------------------------------------------------|----------|-----------------------|--------|-------------|------------------------------------------------------------------------------------|--------|
| <i>ALS2,</i><br><i>ALSJ,</i><br><i>PLSJ,</i><br><i>IAHSP</i>                          | 2q33.1   | Alsin                 | 606352 | NM_020919.3 | Amyotrophic lateral sclerosis 2, juvenile                                          | 205100 |
|                                                                                       |          |                       |        |             | Primary lateral sclerosis, juvenile                                                | 606353 |
|                                                                                       |          |                       |        |             | Spastic paralysis, infantile onset ascending                                       | 607225 |
| <i>TBK1,</i><br><i>NAK,</i><br><i>FTDALS4,</i><br><i>IIAE8</i>                        | 12q14.2  | TANK-binding kinase 1 | 604834 | NM_013254.3 | {Encephalopathy, acute, infection-induced (herpes-specific), susceptibility to, 8} | 617900 |
|                                                                                       |          |                       |        |             | Frontotemporal dementia and/or amyotrophic lateral sclerosis 4                     | 616439 |
| <i>SPG11,</i><br><i>KIAA1840,</i><br><i>FLJ21439,</i><br><i>ALS5,</i><br><i>CMT2X</i> | 15q21.1  | Spastascin            | 610844 | NM_025137.3 | Amyotrophic lateral sclerosis 5, juvenile                                          | 602099 |
|                                                                                       |          |                       |        |             | Charcot-Marie-Tooth disease, axonal, type 2X                                       | 616668 |
|                                                                                       |          |                       |        |             | Spastic paraplegia 11, autosomal recessive                                         | 604360 |
| <i>PFN1,</i><br><i>ALS18</i>                                                          | 17p13.2  | Profilin-1            | 176610 | NM_005022.3 | Amyotrophic lateral sclerosis 18                                                   | 614808 |
| <i>TUBA4A,</i><br><i>TUBA1,</i><br><i>ALS22</i>                                       | 2q35     | Tubulin, alpha-4A     | 191110 | NM_006000.2 | Amyotrophic lateral sclerosis 22 with or without frontotemporal dementia           | 616208 |
| <i>DAO,</i><br><i>DAMOX</i>                                                           | 12q24.11 | D-amino-acid oxidase  | 124050 | NM_001917.4 | {Schizophrenia}                                                                    | 181500 |
| <i>GRN,</i><br><i>CLN11</i>                                                           | 17q21.31 | Granulin              | 138945 | NM_002087.3 | Aphasia, primary progressive                                                       | 607485 |
|                                                                                       |          |                       |        |             | Ceroid lipofuscinosis, neuronal, 11                                                | 614706 |
|                                                                                       |          |                       |        |             | Frontotemporal lobar degeneration with ubiquitin-positive inclusions               | 607485 |

|                                                                                                       |         |                                                                                  |        |             |                                                                                         |        |
|-------------------------------------------------------------------------------------------------------|---------|----------------------------------------------------------------------------------|--------|-------------|-----------------------------------------------------------------------------------------|--------|
| <i>SETX</i> ,<br><i>SCAR1</i> ,<br><i>AOA2</i> ,<br><i>ALS4</i>                                       | 9q34.13 | Senataxin                                                                        | 608465 | NM_015046.6 | Amyotrophic lateral sclerosis 4, juvenile                                               | 602433 |
|                                                                                                       |         |                                                                                  |        |             | Spinocerebellar ataxia, autosomal recessive 1                                           | 606002 |
| <i>TAF15</i> ,<br><i>TAF2N</i> ,<br><i>RBP56</i>                                                      | 17q12   | TAF15 RNA polymerase II,<br>TATA box-binding protein-<br>associated factor, 68kD | 601574 | NM_139215.2 | Chondrosarcoma, extraskeletal myxoid                                                    | 612237 |
| <i>VCP</i> ,<br><i>IBMPFD1</i> ,<br><i>ALS14</i> ,<br><i>CMT2Y</i>                                    | 9p13.3  | Valosin-containing protein                                                       | 601023 | NM_007126.4 | Inclusion body myopathy with early-onset Paget<br>disease and frontotemporal dementia 1 | 167320 |
|                                                                                                       |         |                                                                                  |        |             | Charcot-Marie-Tooth disease, type 2Y                                                    | 616687 |
|                                                                                                       |         |                                                                                  |        |             | Amyotrophic lateral sclerosis 14, with or<br>without frontotemporal dementia            | 613954 |
| <i>UBQLN2</i> ,<br><i>PLIC2</i> ,<br><i>CHAP1</i> ,<br><i>ALS15</i>                                   | Xp11.21 | Ubiquilin 2                                                                      | 300264 | NM_013444.3 | Amyotrophic lateral sclerosis 15, with or<br>without frontotemporal dementia            | 300857 |
| <i>SQSTM1</i> ,<br><i>P62</i> ,<br><i>PDB3</i> ,<br><i>FTDALS3</i> ,<br><i>NADGP</i> ,<br><i>DMRV</i> | 5q35.3  | Sequestosome 1                                                                   | 601530 | NM_003900.4 | Frontotemporal dementia and/or amyotrophic<br>lateral sclerosis 3                       | 616437 |
|                                                                                                       |         |                                                                                  |        |             | Myopathy, distal, with rimmed vacuoles                                                  | 617158 |
|                                                                                                       |         |                                                                                  |        |             | Neurodegeneration with ataxia, dystonia, and<br>gaze palsy, childhood-onset             | 617145 |
|                                                                                                       |         |                                                                                  |        |             | Paget disease of bone 3                                                                 | 167250 |

|                                                                                                      |          |                                                          |        |                |                                                      |        |
|------------------------------------------------------------------------------------------------------|----------|----------------------------------------------------------|--------|----------------|------------------------------------------------------|--------|
| <i>FIG4</i> ,<br><i>KIAA0274</i> ,<br><i>SAC3</i> ,<br><i>ALS11</i> ,<br><i>YVS</i> ,<br><i>BTOP</i> | 6q21     | Fig4, <i>S. cerevisiae</i> , homolog of                  | 609390 | NM_014845.5    | ?Polymicrogyria, bilateral temporooccipital          | 612691 |
|                                                                                                      |          |                                                          |        |                | Amyotrophic lateral sclerosis 11                     | 612577 |
|                                                                                                      |          |                                                          |        |                | Charcot-Marie-Tooth disease, type 4J                 | 611228 |
|                                                                                                      |          |                                                          |        |                | Yunis-Varon syndrome                                 | 216340 |
| <i>ANO2</i> ,<br><i>TMEM16B</i> ,<br><i>C12orf3</i>                                                  | 12p13.31 | Anoctamin 2                                              | 610109 | NM_001278596.1 |                                                      |        |
| <i>APEX</i> ,<br><i>APE</i>                                                                          | 14q11.2  | APEX nuclease (multifunctional DNA repair enzyme)        | 107748 | NM_001641.3    |                                                      |        |
| <i>CEP112</i>                                                                                        | 17q24.1  | Centrosomal protein 112                                  |        | XM_005257119.5 |                                                      |        |
| <i>CHMP2B</i> ,<br><i>DMT1</i> ,<br><i>VPS2B</i> ,<br><i>ALS17</i>                                   | 3p11.2   | CHMP family, member 2B                                   | 609512 | NM_014043.3    | Amyotrophic lateral sclerosis 17                     | 614696 |
|                                                                                                      |          |                                                          |        |                | Dementia, familial, nonspecific                      | 600795 |
| <i>CNTF</i> ,<br><i>HCNTF</i>                                                                        | 11q12.1  | Ciliary neurotrophic factor                              | 118945 | NM_000614.3    |                                                      |        |
| <i>DCTN1</i> ,<br><i>HMN7B</i>                                                                       | 2p13.1   | Dynactin 1 (p150, glued, <i>Drosophila</i> , homolog of) | 601143 | NM_004082.4    | Neuropathy, distal hereditary motor, type VIIB       | 607641 |
|                                                                                                      |          |                                                          |        |                | Perry syndrome                                       | 168605 |
|                                                                                                      |          |                                                          |        |                | { Amyotrophic lateral sclerosis, susceptibility to } | 105400 |

|                                                                                |         |                                  |        |             |                                                    |        |
|--------------------------------------------------------------------------------|---------|----------------------------------|--------|-------------|----------------------------------------------------|--------|
| <i>HFE,</i><br><i>HLA-H,</i><br><i>HFE1,</i><br><i>MVCD7,</i><br><i>TFQTL2</i> | 6p22.2  | Hemochromatosis gene             | 613609 | NM_000410.3 | Hemochromatosis                                    | 235200 |
|                                                                                |         |                                  |        |             | [Transferrin serum level QTL2]                     | 614193 |
|                                                                                |         |                                  |        |             | {Alzheimer disease, susceptibility to}             | 104300 |
|                                                                                |         |                                  |        |             | {Microvascular complications of diabetes 7}        | 612635 |
|                                                                                |         |                                  |        |             | {Porphyria cutanea tarda, susceptibility to}       | 176100 |
|                                                                                |         |                                  |        |             | {Porphyria variegata, susceptibility to}           | 176200 |
| <i>MATR3,</i><br><i>MPD2,</i><br><i>ALS21</i>                                  | 5q31.2  | Matrin 3                         | 164015 | NM_199189.2 | Amyotrophic lateral sclerosis 21                   | 606070 |
| <i>NEFH,</i><br><i>CMT2CC</i>                                                  | 22q12.2 | Neurofilament, heavy polypeptide | 162230 | NM_021076.3 | {Amyotrophic lateral sclerosis, susceptibility to} | 105400 |
|                                                                                |         |                                  |        |             | Charcot-Marie-Tooth disease, axonal, type 2CC      | 616924 |
| <i>PON1,</i><br><i>PON,</i><br><i>ESA,</i><br><i>MVCD5</i>                     | 7q21.3  | Paraoxonase-1                    | 168820 | NM_000446.6 | {Coronary artery disease, susceptibility to}       |        |
|                                                                                |         |                                  |        |             | {Coronary artery spasm 2, susceptibility to}       |        |
|                                                                                |         |                                  |        |             | {Microvascular complications of diabetes 5}        | 612633 |
|                                                                                |         |                                  |        |             | {Organophosphate poisoning, sensitivity to}        |        |

|                                     |          |                                                          |        |                |                                                            |        |
|-------------------------------------|----------|----------------------------------------------------------|--------|----------------|------------------------------------------------------------|--------|
| <i>PON2</i>                         | 7q21.3   | Paraoxonase-2                                            | 602447 | NM_000305.2    | {Coronary artery disease, susceptibility to}               |        |
| <i>PRPH</i>                         | 12q13.12 | Peripherin                                               | 170710 | NM_006262.3    | {Amyotrophic lateral sclerosis, susceptibility to}         | 105400 |
| <i>SMN1, SMA1, SMA2, SMA3, SMA4</i> | 5q13.2   | Survival of motor neuron 1, telomeric                    | 600354 | NM_001297715.1 | Spinal muscular atrophy-1                                  | 253300 |
|                                     |          |                                                          |        |                | Spinal muscular atrophy-2                                  | 253550 |
|                                     |          |                                                          |        |                | Spinal muscular atrophy-3                                  | 253400 |
|                                     |          |                                                          |        |                | Spinal muscular atrophy-4                                  | 271150 |
| <i>SMN2</i>                         | 5q13.2   | Survival of motor neuron 2, centromeric                  | 601627 | NM_022875.2    | {Spinal muscular atrophy, type III, modifier of}           | 253400 |
| <i>VAPB, VAPC, ALS8</i>             | 20q13.32 | Vesicle-associated membrane protein-associated protein B | 605704 | NM_004738.4    | Amyotrophic lateral sclerosis 8                            | 608627 |
|                                     |          |                                                          |        |                | Spinal muscular atrophy, late-onset, Finkel type           | 182980 |
| <i>VEGF, MVCD1</i>                  | 6p21.1   | Vascular endothelial growth factor                       | 192240 | NM_001171623.1 | {Microvascular complications of diabetes 1}                | 603933 |
| <i>CCNF, FBX1</i>                   | 16p13.3  | Cyclin F                                                 | 600227 | NM_001761.2    |                                                            |        |
| <i>NEK1, SRTD6, SRPS2A, ALS24</i>   | 4q33     | Never in mitosis gene A-related kinase 1                 | 604588 | NM_001199397.1 | {Amyotrophic lateral sclerosis, susceptibility to, 24}     | 617892 |
|                                     |          |                                                          |        |                | Short-rib thoracic dysplasia 6 with or without polydactyly | 263520 |
| <i>HNRNPA1, IBMPFD3, ALS20</i>      | 12q13.13 | Heterogeneous nuclear ribonucleoprotein A1               | 164017 | NM_002136.3    | Amyotrophic lateral sclerosis 20                           | 615426 |

|                                                 |      |                                                                         |        |             |                                                                                                 |        |
|-------------------------------------------------|------|-------------------------------------------------------------------------|--------|-------------|-------------------------------------------------------------------------------------------------|--------|
|                                                 |      |                                                                         |        |             | ?Inclusion body myopathy with early-onset<br>Paget disease without frontotemporal dementia<br>3 | 615424 |
| <i>ERBB4</i> ,<br><i>HER4</i> ,<br><i>ALS19</i> | 2q34 | Avian erythroblastic leukemia<br>viral (v-erb-b2) oncogene<br>homolog 4 | 600543 | NM_005235.2 | Amyotrophic lateral sclerosis 19                                                                | 615515 |
