# Supplementary material for: ALS and CHARGE syndrome: a clinical and genetic study
Source: Springer Nature journal article supplement (doi:10.1007/s13760-018-1029-2), 2018-10-13
Supplement: MOESM2 [file 16196540]

Table 2. Sample sequencing metrics

| Sample | Mapped reads | On target | Mean depth | Uniformity | Target base coverage at 20x | Target base coverage at 100x | Amplicons with at least 20 reads | Amplicons with at least 100 reads |
|--------|--------------|-----------|------------|------------|-----------------------------|------------------------------|----------------------------------|-----------------------------------|
| ALS    | 727,468      | 98,30%    | 837        | 93,48%     | 99.04%                      | 96.58%                       | 99.24%                           | 96.98%                            |
| CHARGE | 426,89       | 98,21%    | 210        | 95,06%     | 97.53%                      | 83.58%                       | 98.49%                           | 87.53%                            |
