# Supplementary material for: ALS and CHARGE syndrome: a clinical and genetic study
Source: Springer Nature journal article supplement (doi:10.1007/s13760-018-1029-2), 2018-10-13
Supplement: MOESM3 [file 16196540]

Table A

List of the variants detected in ALS patient

| Chr location   | rs ID       | Variant                     | AA change | Position | Gene   | ExAC frequency in European |
|----------------|-------------|-----------------------------|-----------|----------|--------|----------------------------|
| chr1:11072579  | rs968545    |                             |           | upstream | TARDBP | .                          |
| chr1:11080723  | rs70977536  |                             |           | intronic | TARDBP | .                          |
| chr1:11082055  | rs3835416   |                             |           | intronic | TARDBP | .                          |
| chr1:11085004  | rs5772439   | c.2293_2294insTGTTT         |           | UTR3     | TARDBP | .                          |
| chr2:202569992 | rs3219171   |                             |           | intronic | ALS2   | .                          |
| chr2:202570232 | rs3219170   |                             |           | intronic | ALS2   | 0.9851                     |
| chr2:202574825 | rs1210940   |                             |           | intronic | ALS2   | .                          |
| chr2:202575821 | rs3219168   | C4015T                      | L1339L    | exonic   | ALS2   | 0.9849                     |
| chr2:202575907 | rs2882231   |                             |           | intronic | ALS2   | .                          |
| chr2:202580370 | rs3219167   |                             |           | intronic | ALS2   | 0.7474                     |
| chr2:202598113 | rs2276615   | G2466A                      | V822V     | exonic   | ALS2   | 0.3467                     |
| chr2:202606639 | rs3731703   |                             |           | intronic | ALS2   | .                          |
| chr2:202608877 | rs4673207   |                             |           | intronic | ALS2   | .                          |
| chr2:202625615 | rs3219156   | G1102A                      | V368M     | exonic   | ALS2   | 0.9999                     |
| chr2:202626479 | .           | A238C                       | S80R      | exonic   | ALS2   | .                          |
| chr2:212242192 | rs11895168  | c.6148T>G                   |           | UTR3     | ERBB4  | .                          |
| chr2:212242434 | rs7565960   | c.5906C>T                   |           | UTR3     | ERBB4  | .                          |
| chr2:212242641 | rs1595065   | c.5699C>T                   |           | UTR3     | ERBB4  | .                          |
| chr2:212243075 | rs546283804 | c.5265C>T                   |           | UTR3     | ERBB4  | .                          |
| chr2:212243422 | rs1972820   | c.4918C>T                   |           | UTR3     | ERBB4  | .                          |
| chr2:212243576 |             | c.4764_4762delTGG           |           | UTR3     | ERBB4  | .                          |
| chr2:212243582 |             | c.4758_4757delTA            |           | UTR3     | ERBB4  | .                          |
| chr2:212243703 | rs13003941  | c.4637C>A                   |           | UTR3     | ERBB4  | .                          |
| chr2:212244761 | rs34217661  | c.3578_3579insC             |           | UTR3     | ERBB4  | .                          |
| chr2:212244952 | rs1836724   | c.3388C>T                   |           | UTR3     | ERBB4  | .                          |
| chr2:212245090 | rs6147150   | c.3249_3250insATCCTATTTTCA, |           | UTR3     | ERBB4  | .                          |
| chr2:212245284 | rs12475523  | c.3056T>C                   |           | UTR3     | ERBB4  | .                          |
| chr2:212245489 | rs4672612   | c.2851T>C                   |           | UTR3     | ERBB4  | .                          |
| chr2:212247834 | rs3748960   | c.506G>A                    |           | UTR3     | ERBB4  | .                          |
| chr2:212251864 | rs3748962   | A3147G                      | V1049V    | exonic   | ERBB4  | 0.3081                     |
| chr2:212252809 | rs934607    |                             |           | intronic | ERBB4  | .                          |
| chr2:212285103 | rs2289086   |                             |           | intronic | ERBB4  | .                          |
| chr2:212285340 | rs60420993  |                             |           | intronic | ERBB4  | 0.0808                     |
| chr2:212293044 | rs4672613   |                             |           | intronic | ERBB4  | .                          |
| chr2:212295875 | rs6710946   |                             |           | intronic | ERBB4  | 0.6718                     |
| chr2:212543924 | rs4673628   |                             |           | intronic | ERBB4  | 0.0128                     |
| chr2:212544024 | rs10169970  |                             |           | intronic | ERBB4  | .                          |
| chr2:212544027 | rs67647157  |                             |           | intronic | ERBB4  | .                          |

|                |             |                 |       |                |        |        |
|----------------|-------------|-----------------|-------|----------------|--------|--------|
| chr2:212587321 | rs13002712  |                 |       | intronic       | ERBB4  | .      |
| chr2:212589986 | rs35778743  |                 |       | intronic       | ERBB4  | .      |
| chr2:212615516 | rs6757068   |                 |       | intronic       | ERBB4  | .      |
| chr2:220118531 | rs939574    |                 |       | ncRNA_intronic | TUBA4B | 0.8092 |
| chr3:87276571  | rs36098294  | c.-102C>T       |       | UTR5           | CHMP2B | .      |
| chr3:87295049  | rs11540913  | T189C           | T63T  | exonic         | CHMP2B | 0.8974 |
| chr4:170314368 | rs7672874   |                 |       | downstream     | NEK1   | .      |
| chr4:170314951 | rs13212     | c.710A>G        |       | UTR3           | NEK1   | .      |
| chr4:170315166 | rs1129694   | c.495T>C        |       | UTR3           | NEK1   | .      |
| chr4:170315496 | rs4692721   | c.165G>A        |       | UTR3           | NEK1   | .      |
| chr4:170323113 | rs4478142   |                 |       | intronic       | NEK1   | .      |
| chr4:170354836 | rs7680152   |                 |       | intronic       | NEK1   | 0.8385 |
| chr4:170354873 | rs13139925  |                 |       | intronic       | NEK1   | .      |
| chr4:170359021 | rs6553438   |                 |       | intronic       | NEK1   | .      |
| chr4:170482883 | rs56064008  | T1146C          | I382I | exonic         | NEK1   | 0      |
| chr4:170506703 | rs55679731  |                 |       | intronic       | NEK1   | 0      |
| chr4:170533878 |             |                 |       | upstream       | NEK1   |        |
| chr4:170533878 |             |                 |       | upstream       | NEK1   |        |
| chr4:170533883 |             |                 |       | upstream       | NEK1   |        |
| chr5:138609609 | rs11242456  |                 |       | ncRNA_exonic   | SNHG4  | 0.1045 |
| chr5:138613937 | rs891994    |                 |       | ncRNA_intronic | SNHG4  | .      |
| chr5:138642997 | rs59150359  | c.-108_-107insT |       | UTR5           | MATR3  | .      |
| chr5:138658846 | rs2288823   |                 |       | intronic       | MATR3  | .      |
| chr5:138665756 | rs7305      | c.672G>A        |       | UTR3           | MATR3  | 0.1480 |
| chr5:138666372 | rs10515507  |                 |       | UTR3           | MATR3  | 0.0985 |
| chr5:138667154 |             | c.2070A>C       |       | UTR3           | MATR3  |        |
| chr5:179259842 | rs2450484   |                 |       | intronic       | SQSTM1 | .      |
| chr5:179260153 | rs4935      | C876T           | D292D | exonic         | SQSTM1 | 0.8512 |
| chr5:179260213 | rs4797      | G936A           | R312R | exonic         | SQSTM1 | 0.8214 |
| chr5:179260494 | rs155787    |                 |       | intronic       | SQSTM1 | .      |
| chr6:26087856  | rs2858993   |                 |       | intronic       | HFE    | .      |
| chr6:26091179  | rs1799945   | C187G           | H63D  | exonic         | HFE    | 0.0365 |
| chr6:26091336  | rs2071303   |                 |       | intronic       | HFE    | 0.6788 |
| chr6:26094367  | rs1572982   |                 |       | intronic       | HFE    | 0.7238 |
| chr6:43738350  | rs2010963   | c.-94C>G        |       | UTR5           | VEGFA  | .      |
| chr6:43738977  | rs25648     | C534T           | S178S | exonic         | VEGFA  | 0.0835 |
| chr6:43746169  | rs3025000   |                 |       | intronic       | VEGFA  | 0.4108 |
| chr6:43748643  | rs3025052   |                 |       | intronic       | VEGFA  | 0.9999 |
| chr6:110106277 | rs9320315   |                 |       | intronic       | FIG4   | 0.3951 |
| chr6:110107517 | rs9885672   | T1961C          | V654A | exonic         | FIG4   | 0.4072 |
| chr6:110113765 | rs201752617 |                 |       | intronic       | FIG4   | 0.2590 |
| chr6:110146303 | rs1127771   | G2559A          | S853S | exonic         | FIG4   | 0.5766 |
| chr7:94945872  | rs854559    |                 |       | intronic       | PON1   | .      |
| chr7:94946084  | rs854560    | T163A           | L55M  | exonic         | PON1   | 0.0365 |

|                |             |           |        |          |      |        |
|----------------|-------------|-----------|--------|----------|------|--------|
| chr7:94953895  | rs705379    |           |        | upstream | PON1 | .      |
| chr7:94953913  | rs705380    |           |        | upstream | PON1 | .      |
| chr7:94953949  | rs705381    |           |        | upstream | PON1 | .      |
| chr7:95034821  | rs9641164   |           |        | intronic | PON2 | 0.6401 |
| chr9:35056961  | rs1053318   | c.153G>T  |        | UTR3     | VCP  | .      |
| chr9:35060302  | rs684562    |           |        | intronic | VCP  | 0.0906 |
| chr9:35060746  | rs562381    |           |        | intronic | VCP  | .      |
| chr9:35060955  | rs2258240   |           |        | intronic | VCP  | 0.4680 |
| chr9:35061693  | rs6150985   |           |        | intronic | VCP  | 0.0898 |
| chr9:35062972  | rs514492    |           |        | intronic | VCP  | 0.4643 |
| chr9:35068201  | rs10972300  |           |        | intronic | VCP  | 0.0869 |
| chr9:135138258 | rs7025      | c.1368G>A |        | UTR3     | SETX | .      |
| chr9:135139000 | rs11795382  | c.626C>T  |        | UTR3     | SETX | .      |
| chr9:135139064 | rs11787894  | c.562C>A  |        | UTR3     | SETX | .      |
| chr9:135139901 | rs1056899   | A7759G    | I2587V | exonic   | SETX | 0.7330 |
| chr9:135153359 | rs35537391  |           |        | intronic | SETX | .      |
| chr9:135153668 | rs11243704  |           |        | intronic | SETX | 0.7205 |
| chr9:135153673 | rs11243705  |           |        | intronic | SETX | 0.2923 |
| chr9:135164107 | rs2274563   |           |        | intronic | SETX | .      |
| chr9:135172412 | rs2296869   | T5811C    | D1937D | exonic   | SETX | 0.7005 |
| chr9:135173454 | rs397732808 |           |        | intronic | SETX | 0.6956 |
| chr9:135173685 | rs2296871   | A5563G    | T1855A | exonic   | SETX | 0.7029 |
| chr9:135202829 | rs543573    | A4156G    | I1386V | exonic   | SETX | 0.2984 |
| chr9:135203231 | rs1183768   | G3754A    | G1252R | exonic   | SETX | 0.2982 |
| chr9:135203409 | rs1185193   | T3576G    | D1192E | exonic   | SETX | 0.3062 |
| chr9:135203530 | rs3739922   | T3455G    | F1152C | exonic   | SETX | 0.2720 |
| chr9:135205006 | rs882709    | C1979G    | A660G  | exonic   | SETX | 0.4524 |
| chr9:135206460 | rs9411449   | T1077C    | Y359Y  | exonic   | SETX | 0.3022 |
| chr9:135211532 | rs7036889   |           |        | intronic | SETX | .      |
| chr9:135211610 | rs111938515 |           |        | intronic | SETX | .      |
| chr9:135218047 | rs11790312  |           |        | intronic | SETX | 0.2727 |
| chr9:135221597 | rs497650    |           |        | intronic | SETX | 1      |
| chr9:135230100 | rs517076    |           |        | intronic | SETX | .      |
| chr9:135230222 | rs3739917   |           |        | intronic | SETX | .      |
| chr10:13158262 | rs2244380   |           |        | intronic | OPTN | 0.7315 |
| chr10:13166076 | rs523747    | A964G     | K322E  | exonic   | OPTN | 1      |
| chr10:13167860 | rs676302    |           |        | intronic | OPTN | .      |
| chr12:5674754  | rs2277398   | C2712T    | S904S  | exonic   | ANO2 | 0.4035 |
| chr12:5721962  | rs3741837   |           |        | intronic | ANO2 | .      |
| chr12:5721962  | rs3741837   |           |        | intronic | ANO2 | 0.7981 |
| chr12:5722181  | rs3741838   |           |        | intronic | ANO2 | .      |
| chr12:5757029  | rs367206    |           |        | intronic | ANO2 | .      |
| chr12:5841841  | rs2277401   |           |        | intronic | ANO2 | 0.5734 |
| chr12:5860179  | rs2277402   |           |        | intronic | ANO2 | 0.6326 |

|                 |             |            |       |            |        |        |
|-----------------|-------------|------------|-------|------------|--------|--------|
| chr12:5916350   | rs2277403   |            |       | intronic   | ANO2   | .      |
| chr12:6030301   | rs3741901   | C439T      | P147S | exonic     | ANO2   | 0.0238 |
| chr12:6054395   | rs6489680   | c.-12T>C   |       | UTR5       | ANO2   | 0.8333 |
| chr12:64845715  | rs61933190  |            |       | upstream   | TBK1   | .      |
| chr12:64845867  | rs61933191  | c.-3784G>A |       | UTR5       | TBK1   | .      |
| chr12:64891392  | rs57408363  |            |       | intronic   | TBK1   | 0.0313 |
| chr12:64891393  | .           |            |       | intronic   | TBK1   | .      |
| chr12:64895984  | rs73122364  |            |       | downstream | TBK1   | .      |
| chr12:109278747 | rs2111902   |            |       | intronic   | DAO    | 0.5028 |
| chr12:109281127 | rs75861794  |            |       | intronic   | DAO    | .      |
| chr12:109281310 | rs7980427   | G279A      | S93S  | exonic     | DAO    | 0.0014 |
| chr12:109293320 | rs3918347   |            |       | intronic   | DAO    | .      |
| chr14:20925154  | rs1130409   | T444G      | D148E | exonic     | APEX1  | 0.4123 |
| chr15:44877629  |             |            |       | intronic   | SPG11  |        |
| chr15:44921073  |             |            |       | intronic   | SPG11  |        |
| chr15:44943757  | rs3759871   | T1388C     | F463S | exonic     | SPG11  | 0.4674 |
| chr16:2485896   | rs12928789  |            |       | intronic   | CCNF   | 0.8737 |
| chr16:2488211   | rs12926008  |            |       | intronic   | CCNF   | .      |
| chr16:2498828   | rs28417759  |            |       | intronic   | CCNF   | 0.8722 |
| chr16:2498849   | rs28670436  |            |       | intronic   | CCNF   | 0.8729 |
| chr16:2499011   | rs8060813   |            |       | intronic   | CCNF   | 0.8729 |
| chr16:2499786   | rs374015103 |            |       | intronic   | CCNF   | 0.8651 |
| chr16:2500071   | rs12919892  |            |       | intronic   | CCNF   | .      |
| chr16:31191482  | rs929867    | c.-54A>G   |       | UTR5       | FUS    | 1      |
| chr16:31195279  | rs1052352   | C288T      | Y96Y  | exonic     | FUS    | 0.7513 |
| chr16:31203529  | rs4889537   | c.770G>C   |       | UTR3       | FUS    | 0.1642 |
| chr17:4852463   | rs4790714   |            |       | upstream   | PFN1   | .      |
| chr17:34161084  |             |            |       | intronic   | TAF15  |        |
| chr17:34171755  |             | T1443A     | G481G | exonic     | TAF15  |        |
| chr17:34171758  | .           | C1446T     | G482G | exonic     | TAF15  | 0      |
| chr17:34171827  | rs4251786   | C1515T     | Y505Y | exonic     | TAF15  | 0.0002 |
| chr17:42426940  | rs9897526   |            |       | intronic   | GRN    | 0.0929 |
| chr17:42430244  | rs5848      | c.78C>T    |       | UTR3       | GRN    | .      |
| chr17:63739352  | rs12948946  |            |       | intronic   | CEP112 | 0.0663 |
| chr17:63822357  | rs62065084  | A61G       | I21V  | exonic     | CEP112 | 0.1271 |
| chr17:64001925  | rs1015098   |            |       | intronic   | CEP112 | 0.8758 |
| chr17:64023552  | rs12449542  |            |       | intronic   | CEP112 | .      |
| chr17:64023624  | rs17704679  | A1525G     | K509E | exonic     | CEP112 | 0.2150 |
| chr17:64023642  | rs11079628  | T1507C     | L503L | exonic     | CEP112 | 0.8612 |
| chr17:64023781  | rs11079629  |            |       | intronic   | CEP112 | .      |
| chr17:64023800  | rs11079630  |            |       | intronic   | CEP112 | .      |
| chr17:64024248  | rs62063399  |            |       | intronic   | CEP112 | .      |
| chr17:64024255  | rs56239919  |            |       | intronic   | CEP112 | .      |
| chr17:64024303  | rs4277386   |            |       | intronic   | CEP112 | .      |

|                |             |                         |            |          |         |        |
|----------------|-------------|-------------------------|------------|----------|---------|--------|
| chr17:64024340 | rs9901053   |                         |            | intronic | CEP112  | .      |
| chr17:64024375 | rs9899985   |                         |            | intronic | CEP112  | .      |
| chr17:64025331 | rs11652766  | T1287C                  | N471N      | exonic   | CEP112  | 0.1016 |
| chr17:64025435 | rs60700240  |                         |            | intronic | CEP112  | .      |
| chr17:64025926 | rs9908964   |                         |            | intronic | CEP112  | .      |
| chr17:64050007 | rs11079637  |                         |            | intronic | CEP112  | 0.8758 |
| chr17:64050062 | rs1401048   |                         |            | intronic | CEP112  | .      |
| chr17:64050123 | rs8068229   |                         |            | intronic | CEP112  | .      |
| chr17:64062699 | rs5821547   |                         |            | intronic | CEP112  | .      |
| chr17:64062830 | rs908713    |                         |            | intronic | CEP112  | .      |
| chr20:57022713 | rs3069390   | c.3422_3429delTGTTGTGCA |            | UTR3     | VAPB    | 0.9091 |
| chr20:57023562 | rs4549163   | c.4271A>G               |            | UTR3     | VAPB    | 0.0076 |
| chr20:57024541 | rs6015274   | c.5250T>C               |            | UTR3     | VAPB    | 0.6061 |
| chr22:24108288 | rs140182    |                         |            | intronic | CHCHD10 | 0.6164 |
| chr22:24109550 | rs131444    |                         |            | intronic | CHCHD10 | 0.7191 |
| chr22:24109774 | rs179468    | A48C                    | P16P       | exonic   | CHCHD10 | 1      |
| chr22:29881884 | rs4823040   |                         |            | intronic | NEFH    | 1      |
| chr22:29885016 | rs59371099  | G1387A                  | E463K      | exonic   | NEFH    | 0.0005 |
| chr22:29885581 | rs267607533 | 1952_1975del            | 651_659del | exonic   | NEFH    | 0.0001 |
| chr22:29885599 | rs373980795 | 1970_1975del            | 657_659del | exonic   | NEFH    | 0.0005 |
| chr22:29885618 | rs367989424 | T1989A                  | P663P      | exonic   | NEFH    | 0      |
| chr22:29885771 |             | A2142G                  | E714E      | exonic   | NEFH    |        |
| chr22:29885861 | rs165923    | T2232C                  | A744A      | exonic   | NEFH    | 0.8192 |
| chr22:29886413 | rs165625    | A2784G                  | V928V      | exonic   | NEFH    | 0.9230 |

#### List of the variants detected in CHARGE patient

| Chr location   | rs ID      | Variant             | AA change | Position | Gene   | ExAC frequency in European |
|----------------|------------|---------------------|-----------|----------|--------|----------------------------|
| chr1:11072579  | rs968545   |                     |           | upstream | TARDBP | .                          |
| chr1:11080723  | rs70977536 |                     |           | intronic | TARDBP | .                          |
| chr1:11082055  | rs3835416  |                     |           | intronic | TARDBP | .                          |
| chr1:11085004  | rs5772439  | c.2293_2294insTGTTT |           | UTR3     | TARDBP | .                          |
| chr2:202569992 | rs3219171  |                     |           | intronic | ALS2   | .                          |
| chr2:202570232 | rs3219170  |                     |           | intronic | ALS2   | 0.9851                     |
| chr2:202574825 | rs1210940  |                     |           | intronic | ALS2   | .                          |
| chr2:202575821 | rs3219168  | C4015T              | L1339L    | exonic   | ALS2   | 0.9849                     |
| chr2:202575907 | rs2882231  |                     |           | intronic | ALS2   | .                          |
| chr2:202580370 | rs3219167  |                     |           | intronic | ALS2   | 0.7474                     |
| chr2:202587583 | rs78117864 |                     |           | intronic | ALS2   | .                          |
| chr2:202598113 | rs2276615  | G2466A              | V822V     | exonic   | ALS2   | 0.3467                     |
| chr2:202606639 | rs3731703  |                     |           | intronic | ALS2   | .                          |
| chr2:202608877 | rs4673207  |                     |           | intronic | ALS2   | .                          |

|                |             |                            |        |                |              |        |
|----------------|-------------|----------------------------|--------|----------------|--------------|--------|
| chr2:202625615 | rs3219156   | G1102A                     | V368M  | exonic         | ALS2         | 0.9999 |
| chr2:212242192 | rs11895168  | c.6148T>G                  |        | UTR3           | ERBB4        | .      |
| chr2:212242434 | rs7565960   | c.5906C>T                  |        | UTR3           | ERBB4        | .      |
| chr2:212242641 | rs1595065   | c.5699C>T                  |        | UTR3           | ERBB4        | .      |
| chr2:212243422 | rs1972820   | c.4918C>T                  |        | UTR3           | ERBB4        | .      |
| chr2:212243703 | rs13003941  | c.4637C>A                  |        | UTR3           | ERBB4        | .      |
| chr2:212244761 | rs34217661  | c.3578_3579insC            |        | UTR3           | ERBB4        | .      |
| chr2:212244952 | rs1836724   | c.3388C>T                  |        | UTR3           | ERBB4        | .      |
| chr2:212245090 | rs6147150   | c.3249_3250insATCCTATTTTCA |        | UTR3           | ERBB4        | .      |
| chr2:212245284 | rs12475523  | c.3056T>C                  |        | UTR3           | ERBB4        | .      |
| chr2:212245489 | rs4672612   | c.2851T>C                  |        | UTR3           | ERBB4        | .      |
| chr2:212247834 | rs3748960   | c.506G>A                   |        | UTR3           | ERBB4        | .      |
| chr2:212251864 | rs3748962   | A3147G                     | V1049V | exonic         | ERBB4        | 0.3081 |
| chr2:212252809 | rs934607    |                            |        | intronic       | ERBB4        | .      |
| chr2:212285103 | rs2289086   |                            |        | intronic       | ERBB4        | .      |
| chr2:212293044 | rs4672613   |                            |        | intronic       | ERBB4        | .      |
| chr2:212295875 | rs6710946   |                            |        | intronic       | ERBB4        | 0.6718 |
| chr2:212543924 | rs4673628   |                            |        | intronic       | ERBB4        | 0.0128 |
| chr2:212544024 | rs10169970  |                            |        | intronic       | ERBB4        | .      |
| chr2:212587321 | rs13002712  |                            |        | intronic       | ERBB4        | .      |
| chr2:220114630 | rs138911012 | c.1349A>G                  |        | UTR3           | STK16;TUBA4A | .      |
| chr2:220118531 | rs939574    |                            |        | ncRNA_intronic | TUBA4B       | 0.8092 |
| chr3:87295049  | rs11540913  | T189C                      | T63T   | exonic         | CHMP2B       | 0.8974 |
| chr4:170314368 | rs7672874   |                            |        | downstream     | NEK1         | .      |
| chr4:170314951 | rs13212     | c.710A>G                   |        | UTR3           | NEK1         | .      |
| chr4:170315166 | rs1129694   | c.495T>C                   |        | UTR3           | NEK1         | .      |
| chr4:170315496 | rs4692721   | c.165G>A                   |        | UTR3           | NEK1         | .      |
| chr4:170323113 | rs4478142   |                            |        | intronic       | NEK1         | .      |
| chr4:170354836 | rs7680152   |                            |        | intronic       | NEK1         | 0.8385 |
| chr4:170354873 | rs13139925  |                            |        | intronic       | NEK1         | .      |
| chr4:170359021 | rs6553438   |                            |        | intronic       | NEK1         | .      |
| chr4:170428352 | rs370525243 |                            |        | intronic       | NEK1         | .      |
| chr4:170482883 | rs56064008  | T1146C                     | I382I  | exonic         | NEK1         | 0      |
| chr4:170506703 | rs55679731  |                            |        | intronic       | NEK1         | 0      |
| chr5:138609609 | rs11242456  |                            |        | ncRNA_exonic   | SNHG4        | 0.1045 |
| chr5:138613937 | rs891994    |                            |        | ncRNA_intronic | SNHG4        | .      |
| chr5:138642997 | rs59150359  | c.-108_-107insT            |        | UTR5           | MATR3        | .      |
| chr5:138652884 | rs181594315 |                            |        | intronic       | MATR3        | .      |
| chr5:138658846 | rs2288823   |                            |        | intronic       | MATR3        | .      |
| chr5:138665756 | rs7305      | c.672G>A                   |        | UTR3           | MATR3        | 0.1480 |
| chr5:138666372 | rs10515507  | c.1288T>G                  |        | UTR3           | MATR3        | 0.0985 |
| chr5:179259842 | rs2450484   |                            |        | intronic       | SQSTM1       | .      |
| chr5:179260153 | rs4935      | C876T                      | D292D  | exonic         | SQSTM1       | 0.8512 |
| chr5:179260213 | rs4797      | G936A                      | R312R  | exonic         | SQSTM1       | 0.8214 |

|                |             |                |        |              |              |        |
|----------------|-------------|----------------|--------|--------------|--------------|--------|
| chr5:179260494 | rs155787    |                |        | intronic     | SQSTM1       | .      |
| chr6:26087856  | rs2858993   |                |        | ncRNA_exonic | LOC108783645 | .      |
| chr6:26091336  | rs2071303   |                |        | intronic     | HFE          | 0.6788 |
| chr6:26093236  | rs1800758   |                |        | intronic     | HFE          | 0.0465 |
| chr6:26093303  | rs1800708   |                |        | intronic     | HFE          | 0.5685 |
| chr6:26094367  | rs1572982   |                |        | intronic     | HFE          | 0.7238 |
| chr6:43746169  | rs3025000   |                |        | intronic     | VEGFA        | 0.4108 |
| chr6:43748643  | rs3025052   |                |        | intronic     | VEGFA        | 0.9999 |
| chr6:110036274 | rs56378532  |                |        | intronic     | FIG4         | 0.0093 |
| chr6:110053721 | rs11153215  |                |        | intronic     | FIG4         | .      |
| chr6:110059510 | rs2273752   |                |        | intronic     | FIG4         | 0.3777 |
| chr6:110106234 | rs10499054  |                |        | intronic     | FIG4         | 0.3269 |
| chr6:110110943 | rs9384723   |                |        | intronic     | FIG4         | .      |
| chr6:110146303 | rs1127771   | G2559A         | S853S  | exonic       | FIG4         | 0.5766 |
| chr7:94937419  | rs80019660  | C602T          | A201V  | exonic       | PON1         | 0      |
| chr7:94945872  | rs854559    |                |        | intronic     | PON1         | .      |
| chr7:94946084  | rs854560    | T163A          | L55M   | exonic       | PON1         | 0.0365 |
| chr7:94953895  | rs705379    |                |        | upstream     | PON1         | .      |
| chr7:94953913  | rs705380    |                |        | upstream     | PON1         | .      |
| chr7:94953949  | rs705381    |                |        | upstream     | PON1         | .      |
| chr9:35056961  | rs1053318   | c.153G>T       |        | UTR3         | VCP          | .      |
| chr9:35060302  | rs684562    |                |        | intronic     | VCP          | 0.0906 |
| chr9:35060746  | rs562381    |                |        | intronic     | VCP          | .      |
| chr9:35060955  | rs2258240   |                |        | intronic     | VCP          | 0.4680 |
| chr9:35061693  | rs6150985   |                |        | intronic     | VCP          | 0.0898 |
| chr9:35062972  | rs514492    |                |        | intronic     | VCP          | 0.4643 |
| chr9:35068201  | rs10972300  |                |        | intronic     | VCP          | 0.0869 |
| chr9:135137364 | rs997784    | c.2262A>G      |        | UTR3         | SETX         | .      |
| chr9:135138258 | rs7025      | c.1368G>A      |        | UTR3         | SETX         | .      |
| chr9:135139000 | rs11795382  | c.626C>T       |        | UTR3         | SETX         | .      |
| chr9:135139064 | rs11787894  | c.562C>A       |        | UTR3         | SETX         | .      |
| chr9:135139195 | .           | c.431_430delAG |        | UTR3         | SETX         | .      |
| chr9:135139901 | rs1056899   | A7759G         | I2587V | exonic       | SETX         | 0.7330 |
| chr9:135146993 | rs7046688   |                |        | intronic     | SETX         | .      |
| chr9:135150616 | rs2296865   |                |        | intronic     | SETX         | 0.4375 |
| chr9:135152439 | rs17148873  |                |        | intronic     | SETX         | 0.0442 |
| chr9:135153668 | rs11243704  |                |        | intronic     | SETX         | 0.7205 |
| chr9:135153673 | rs11243705  |                |        | intronic     | SETX         | 0.2923 |
| chr9:135164107 | rs2274563   |                |        | intronic     | SETX         | .      |
| chr9:135172412 | rs2296869   | T5811C         | D1937D | exonic       | SETX         | 0.7005 |
| chr9:135173454 | rs397732808 |                |        | intronic     | SETX         | 0.6956 |
| chr9:135173685 | rs2296871   | A5563G         | T1855A | exonic       | SETX         | 0.7029 |
| chr9:135203530 | rs3739922   | T3455G         | F1152C | exonic       | SETX         | 0.2720 |
| chr9:135203548 | .           | G3437A         | S1146N | exonic       | SETX         | .      |

|                |             |            |        |                |            |        |
|----------------|-------------|------------|--------|----------------|------------|--------|
| chr9:135203838 | rs3739921   | C3147T     | H1049H | exonic         | SETX       | 0.2371 |
| chr9:135205006 | rs882709    | C1979G     | A660G  | exonic         | SETX       | 0.4524 |
| chr9:135211532 | rs7036889   |            |        | intronic       | SETX       | .      |
| chr9:135218047 | rs11790312  |            |        | intronic       | SETX       | 0.2727 |
| chr9:135221597 | rs497650    |            |        | intronic       | SETX       | 1      |
| chr9:135230222 | rs3739917   | c.-5407G>A |        | UTR5           | SETX       | .      |
| chr10:13158262 | rs2244380   |            |        | intronic       | OPTN       | 0.7315 |
| chr10:13166076 | rs523747    | A964G      | K322E  | exonic         | OPTN       | 1      |
| chr10:13167860 | rs676302    |            |        | intronic       | OPTN       | .      |
| chr11:58391501 | rs1800169   |            |        | ncRNA_intronic | ZFP91-CNTF | 0.1430 |
| chr12:5674754  | rs2277398   | C2712T     | S904S  | exonic         | ANO2       | 0.4035 |
| chr12:5721962  | rs3741837   |            |        | intronic       | ANO2       | 0.2019 |
| chr12:5721962  | rs3741837   |            |        | intronic       | ANO2       | 0.7981 |
| chr12:5722181  | rs3741838   |            |        | intronic       | ANO2       | .      |
| chr12:5757029  | rs367206    |            |        | intronic       | ANO2       | .      |
| chr12:5841841  | rs2277401   |            |        | intronic       | ANO2       | 0.5734 |
| chr12:5860179  | rs2277402   |            |        | intronic       | ANO2       | 0.6326 |
| chr12:5916350  | rs2277403   |            |        | intronic       | ANO2       | .      |
| chr12:64845715 | rs61933190  |            |        | upstream       | TBK1       | .      |
| chr12:64845867 | rs61933191  | c.-3784G>A |        | UTR5           | TBK1       | .      |
| chr12:64891392 | rs774616946 |            |        | intronic       | TBK1       | 0.0313 |
| chr12:64891393 | rs774616946 |            |        | intronic       | TBK1       | 0      |
| chr12:64895984 | rs73122364  |            |        | downstream     | TBK1       | .      |
| chr14:20925154 | rs1130409   | T444G      | D148E  | exonic         | APEX1      | 0.4123 |
| chr15:44877650 | .           |            |        | intronic       | SPG11      | .      |
| chr15:44921069 |             |            |        | intronic       | SPG11      |        |
| chr15:44921066 |             |            |        | intronic       | SPG11      |        |
| chr15:44943757 | rs3759871   | T1388C     | F463S  | exonic         | SPG11      | 0.4674 |
| chr15:44955880 | rs762777908 |            |        | upstream       | SPG11      | 0      |
| chr16:2485896  | rs12928789  |            |        | intronic       | CCNF       | 0.8737 |
| chr16:2487224  | rs200540114 | T441C      | P147P  | exonic         | CCNF       | 0      |
| chr16:2488211  | rs12926008  |            |        | intronic       | CCNF       | .      |
| chr16:2498828  | rs28417759  |            |        | intronic       | CCNF       | 0.8722 |
| chr16:2498849  | rs28670436  |            |        | intronic       | CCNF       | 0.8729 |
| chr16:2499011  | rs8060813   |            |        | intronic       | CCNF       | 0.8729 |
| chr16:2500071  | rs12919892  |            |        | intronic       | CCNF       | .      |
| chr16:31191482 | rs929867    | c.-54A>G   |        | UTR5           | FUS        | 1      |
| chr16:31195279 | rs1052352   | C288T      | Y96Y   | exonic         | FUS        | 0.7513 |
| chr16:31203529 | rs4889537   | c.770G>C   |        | UTR3           | FUS        | 0.1642 |
| chr17:4848987  |             | c.208T>G   |        | UTR3           | PFN1       |        |
| chr17:4852463  | rs4790714   |            |        | upstream       | PFN1       | .      |
| chr17:34161072 |             |            |        | intronic       | TAF15      |        |
| chr17:34161080 | rs555404761 |            |        | intronic       | TAF15      | .      |
| chr17:34161084 |             |            |        | intronic       | TAF15      |        |



|                |             |                                 |              |          |         |        |
|----------------|-------------|---------------------------------|--------------|----------|---------|--------|
| chr17:34171755 |             | T1443A                          | G481G        | exonic   | TAF15   |        |
| chr17:34171827 | rs4251786   | C1515T                          | Y505Y        | exonic   | TAF15   | 0.0002 |
| chr17:42426940 | rs9897526   |                                 |              | intronic | GRN     | 0.0929 |
| chr17:63739352 | rs12948946  |                                 |              | intronic | CEP112  | 0.0663 |
| chr17:63822357 | rs62065084  | A61G                            | I21V         | exonic   | CEP112  | 0.1271 |
| chr17:64001925 | rs1015098   |                                 |              | intronic | CEP112  | 0.8758 |
| chr17:64023552 | rs12449542  |                                 |              | intronic | CEP112  | .      |
| chr17:64023624 | rs17704679  | A1525G                          | K509E        | exonic   | CEP112  | 0.2150 |
| chr17:64023642 | rs11079628  | T1507C                          | L503L        | exonic   | CEP112  | 0.8612 |
| chr17:64023781 | rs11079629  |                                 |              | intronic | CEP112  | .      |
| chr17:64023800 | rs11079630  |                                 |              | intronic | CEP112  | .      |
| chr17:64024248 | rs62063399  |                                 |              | intronic | CEP112  | .      |
| chr17:64024255 | rs56239919  |                                 |              | intronic | CEP112  | .      |
| chr17:64024303 | rs4277386   |                                 |              | intronic | CEP112  | .      |
| chr17:64024340 | rs9901053   |                                 |              | intronic | CEP112  | .      |
| chr17:64024375 | rs9899985   |                                 |              | intronic | CEP112  | .      |
| chr17:64025331 | rs11652766  | T1287C                          | N429N        | exonic   | CEP112  | 0.1016 |
| chr17:64025435 | rs60700240  |                                 |              | intronic | CEP112  | .      |
| chr17:64025926 | rs9908964   |                                 |              | intronic | CEP112  | .      |
| chr17:64050007 | rs11079637  |                                 |              | intronic | CEP112  | 0.8758 |
| chr17:64050062 | rs1401048   |                                 |              | intronic | CEP112  | .      |
| chr17:64050123 | rs8068229   |                                 |              | intronic | CEP112  | .      |
| chr17:64062699 | rs753396562 |                                 |              | intronic | CEP112  | .      |
| chr17:64062830 | rs908713    |                                 |              | intronic | CEP112  | .      |
| chr20:57009796 | rs2234487   |                                 |              | intronic | VAPB    | 0.5759 |
| chr20:57013873 | rs2234489   |                                 |              | intronic | VAPB    | .      |
| chr20:57020573 | rs1802459   | c.1282A>G                       |              | UTR3     | VAPB    | 0.2727 |
| chr20:57020760 |             | c.1469_1485delGTGTGTGTGTGTGTGTG |              | UTR3     | VAPB    |        |
| chr20:57022713 | rs3069390   | c.3422_3429delTGTGTGCA          |              | UTR3     | VAPB    | 0.9091 |
| chr20:57024541 | rs6015274   | c.5250T>C                       |              | UTR3     | VAPB    | 0.6061 |
| chr20:57024589 | rs6015275   | c.5298C>T                       |              | UTR3     | VAPB    | 0.2727 |
| chr22:24108288 | rs140182    |                                 |              | intronic | CHCHD10 | 0.6164 |
| chr22:24109550 | rs131444    |                                 |              | intronic | CHCHD10 | 0.7191 |
| chr22:24109774 | rs179468    | A48C                            | P16P         | exonic   | CHCHD10 | 1      |
| chr22:29881884 | rs4823040   |                                 |              | intronic | NEFH    | 1      |
| chr22:29885016 | rs59371099  | G1387A                          | E463K        | exonic   | NEFH    | 0.0005 |
| chr22:29885536 | .           | A1907G                          | E636G        | exonic   | NEFH    | .      |
| chr22:29885599 | rs373980795 | 1970_1975del                    | E658_E659del | exonic   | NEFH    | 0.0005 |
| chr22:29885861 | rs165923    | T2232C                          | A744A        | exonic   | NEFH    | 0.8192 |
| chr22:29886413 | rs165625    | A2784G                          | V928V        | exonic   | NEFH    | 0.9230 |
