# Supplementary material for: ALS and CHARGE syndrome: a clinical and genetic study
Source: Springer Nature journal article supplement (doi:10.1007/s13760-018-1029-2), 2018-10-13
Supplement: MOESM4 [file 16196540]

Table B

List of the variants detected only in ALS patient

| Chr location    | rs ID       | Variant           | AA change | Position | Gene   | ExAC frequency in European |
|-----------------|-------------|-------------------|-----------|----------|--------|----------------------------|
| chr2:202626479  | .           | A238C             | S80R      | exonic   | ALS2   | .                          |
| chr2:212243075  | rs546283804 | c.5265C>T         |           | UTR3     | ERBB4  | .                          |
| chr2:212243576  |             | c.4764_4762delTGG |           | UTR3     | ERBB4  |                            |
| chr2:212243582  |             | c.4758_4757delTA  |           | UTR3     | ERBB4  |                            |
| chr2:212285340  | rs60420993  |                   |           | intronic | ERBB4  | 0.0808                     |
| chr2:212544027  | rs67647157  |                   |           | intronic | ERBB4  | .                          |
| chr2:212589986  | rs35778743  |                   |           | intronic | ERBB4  | .                          |
| chr2:212615516  | rs6757068   |                   |           | intronic | ERBB4  | .                          |
| chr3:87276571   | rs36098294  | c.-102C>T         |           | UTR5     | CHMP2B | .                          |
| chr4:170533878  |             |                   |           | upstream | NEK1   |                            |
| chr4:170533878  |             |                   |           | upstream | NEK1   |                            |
| chr4:170533883  |             |                   |           | upstream | NEK1   |                            |
| chr5:138667154  |             | c.2070A>C         |           | UTR3     | MATR3  |                            |
| chr6:26091179   | rs1799945   | C187G             | H63D      | exonic   | HFE    | 0.0365                     |
| chr6:43738350   | rs2010963   | c.-94C>G          |           | UTR5     | VEGFA  | .                          |
| chr6:43738977   | rs25648     | C534T             | S178S     | exonic   | VEGFA  | 0.0835                     |
| chr6:110106277  | rs9320315   |                   |           | intronic | FIG4   | 0.3951                     |
| chr6:110107517  | rs9885672   | T1961C            | V654A     | exonic   | FIG4   | 0.4072                     |
| chr6:110113765  | rs201752617 |                   |           | intronic | FIG4   | 0.2590                     |
| chr7:95034821   | rs9641164   |                   |           | intronic | PON2   | 0.6401                     |
| chr9:135153359  | rs35537391  |                   |           | intronic | SETX   | .                          |
| chr9:135202829  | rs543573    | A4156G            | I1386V    | exonic   | SETX   | 0.2984                     |
| chr9:135203231  | rs1183768   | G3754A            | G1252R    | exonic   | SETX   | 0.2982                     |
| chr9:135203409  | rs1185193   | T3576G            | D1192E    | exonic   | SETX   | 0.3062                     |
| chr9:135206460  | rs9411449   | T1077C            | Y359Y     | exonic   | SETX   | 0.3022                     |
| chr9:135211610  | rs111938515 |                   |           | intronic | SETX   | .                          |
| chr9:135230100  | rs517076    |                   |           | intronic | SETX   | .                          |
| chr12:6030301   | rs3741901   | C439T             | P147S     | exonic   | ANO2   | 0.0238                     |
| chr12:6054395   | rs6489680   | c.-12T>C          |           | UTR5     | ANO2   | 0.8333                     |
| chr12:109278747 | rs2111902   |                   |           | intronic | DAO    | 0.5028                     |
| chr12:109281127 | rs75861794  |                   |           | intronic | DAO    | .                          |
| chr12:109281310 | rs7980427   | G279A             | S93S      | exonic   | DAO    | 0.0014                     |
| chr12:109293320 | rs3918347   |                   |           | intronic | DAO    | .                          |
| chr15:44877629  |             |                   |           | intronic | SPG11  |                            |
| chr15:44921073  |             |                   |           | intronic | SPG11  |                            |
| chr16:2499786   | rs374015103 |                   |           | intronic | CCNF   | 0.8651                     |
| chr17:34171758  | .           | C1446T            | G482G     | exonic   | TAF15  | 0                          |
| chr17:42430244  | rs5848      | c.78C>T           |           | UTR3     | GRN    | .                          |
| chr20:57023562  | rs4549163   | c.4271A>G         |           | UTR3     | VAPB   | 0.0076                     |

|                |             |              |            |        |      |        |
|----------------|-------------|--------------|------------|--------|------|--------|
| chr22:29885581 | rs267607533 | 1952_1975del | 651_659del | exonic | NEFH | 0.0001 |
| chr22:29885618 | rs367989424 | T1989A       | P663P      | exonic | NEFH | 0      |
| chr22:29885771 |             | A2142G       | E714E      | exonic | NEFH |        |

List of the variants detected only in CHARGE patient

| Chr location   | rs ID       | Variant                         | AA change | Position       | Gene         | ExAC frequency in European |
|----------------|-------------|---------------------------------|-----------|----------------|--------------|----------------------------|
| chr2:202587583 | rs78117864  |                                 |           | intronic       | ALS2         | .                          |
| chr2:220114630 | rs138911012 | c.1349A>G                       |           | UTR3           | STK16;TUBA4A | .                          |
| chr4:170428352 | rs370525243 |                                 |           | intronic       | NEK1         | .                          |
| chr5:138652884 | rs181594315 |                                 |           | intronic       | MATR3        | .                          |
| chr6:26093236  | rs1800758   |                                 |           | intronic       | HFE          | 0.0465                     |
| chr6:26093303  | rs1800708   |                                 |           | intronic       | HFE          | 0.5685                     |
| chr6:110036274 | rs56378532  |                                 |           | intronic       | FIG4         | 0.0093                     |
| chr6:110053721 | rs11153215  |                                 |           | intronic       | FIG4         | .                          |
| chr6:110059510 | rs2273752   |                                 |           | intronic       | FIG4         | 0.3777                     |
| chr6:110106234 | rs10499054  |                                 |           | intronic       | FIG4         | 0.3269                     |
| chr6:110110943 | rs9384723   |                                 |           | intronic       | FIG4         | .                          |
| chr7:94937419  | rs80019660  | C602T                           | A201V     | exonic         | PON1         | 0                          |
| chr9:135137364 | rs997784    | c.2262A>G                       |           | UTR3           | SETX         | .                          |
| chr9:135139195 | .           | c.431_430delAG                  |           | UTR3           | SETX         | .                          |
| chr9:135146993 | rs7046688   |                                 |           | intronic       | SETX         | .                          |
| chr9:135150616 | rs2296865   |                                 |           | intronic       | SETX         | 0.4375                     |
| chr9:135152439 | rs17148873  |                                 |           | intronic       | SETX         | 0.0442                     |
| chr9:135203548 | .           | G3437A                          | S1146N    | exonic         | SETX         | .                          |
| chr9:135203838 | rs3739921   | C3147T                          | H1049H    | exonic         | SETX         | 0.2371                     |
| chr11:58391501 | rs1800169   |                                 |           | ncRNA_intronic | ZFP91-CNTF   | 0.1430                     |
| chr15:44877650 | .           |                                 |           | intronic       | SPG11        | .                          |
| chr15:44921069 |             |                                 |           | intronic       | SPG11        |                            |
| chr15:44921066 |             |                                 |           | intronic       | SPG11        |                            |
| chr15:44955880 | rs762777908 |                                 |           | upstream       | SPG11        | 0                          |
| chr16:2487224  | rs200540114 | T441C                           | P147P     | exonic         | CCNF         | 0                          |
| chr17:4848987  |             | c.208T>G                        |           | UTR3           | PFN1         |                            |
| chr17:34161072 |             |                                 |           | intronic       | TAF15        |                            |
| chr17:34161080 | rs555404761 |                                 |           | intronic       | TAF15        | .                          |
| chr20:57009796 | rs2234487   |                                 |           | intronic       | VAPB         | 0.5759                     |
| chr20:57013873 | rs2234489   |                                 |           | intronic       | VAPB         | .                          |
| chr20:57020573 | rs1802459   | c.1282A>G                       |           | UTR3           | VAPB         | 0.2727                     |
| chr20:57020760 |             | c.1469_1485delGTGTGTGTGTGTGTGTG |           | UTR3           | VAPB         |                            |
| chr20:57024589 | rs6015275   | c.5298C>T                       |           | UTR3           | VAPB         | 0.2727                     |
| chr22:29885536 | .           | A1907G                          | E636G     | exonic         | NEFH         | .                          |
